# Supplementary material for: Shared active site architecture between archaeal PolD and multi-subunit RNA polymerases revealed by X-ray crystallography
Source: PubMed Central journal article supplement (PMC4996933; doi:10.1038/ncomms12227), 2016-08-22
Supplement: ncomms12227-s1.pdf [file ncomms12227-s1.pdf]

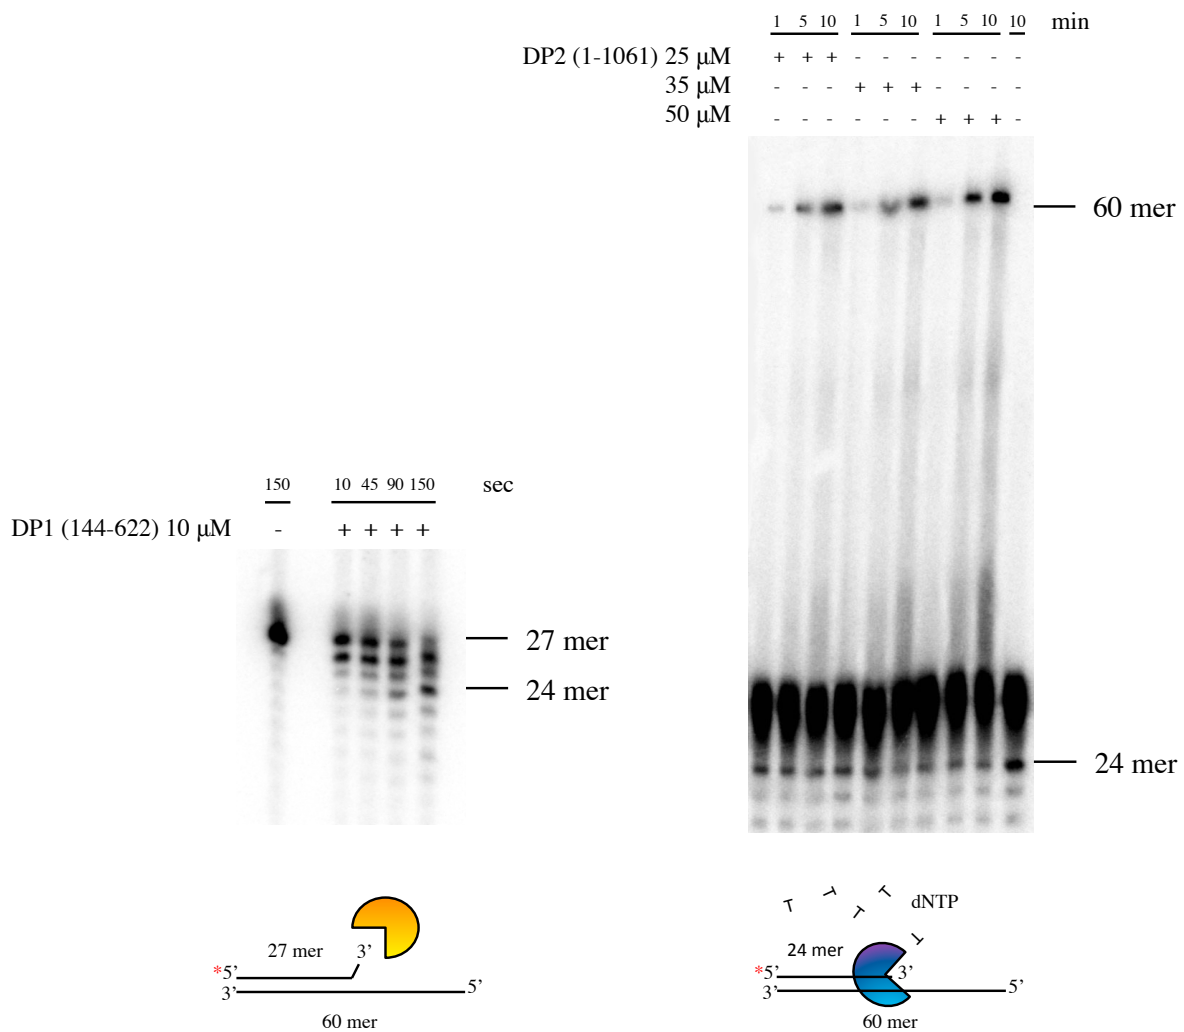

**Supplementary Figure 1: DP1(144-622) possesses 3'-5' exonuclease activity and DP2(1-1061) is capable of 5'-3' DNA primer extension.** Left panel shows the time-course of the 3'-5' digestion of mispaired nucleotides by DP1(144-622). A control experiment obtained in absence of DP1 is also shown (left band). Right panel shows time-course of the 5'-3' primer-elongation assays with the indicated increasing amounts of DP2(1-1061). A control experiment was performed in absence of DP2 (right band). Details for the nuclease and primer-extension activity assays are provided in Methods section.

*P. abyssi*

1 10 20 30 40 50 60

*P. abyssi* MDELVKALERAGYLLTPSAYYLLVDHFKEGKFSLVLELVKFAKSKGVFIIDGDLAYEFLQFLGL.....  
*T. barophilus* MNELVKDLLSNRYLITPPAYFILSEYYRKN.FTLAELIKFARTKNTFVIDERLAKEFLESKGLLSPLENFAC  
*M. jannaschii* .....  
*N. pharaonis* .....  
*N. limnia* .....

*P. abyssi*

70 80 90

*P. abyssi* .....GV**PQ****EI**.....**K**SYISTGEEAEKTV.....SQETRAS.....**ELEE**  
*T. barophilus* YIPKASVETKAETPSSIPGV**PM****EIS**ISKGS**K**EISIQSAVGGEKTA**L**GKMVEIP**PQ**ASDKTEIAHD**IQ**EL**LP**S  
*M. jannaschii* .....**MEI**INKFLD**L**EALLSPTVYE**K**LKNFDE**E**KLRL**I**Q**K**IRE**F**KKY**N**NA**F**IL**L**LD  
*N. pharaonis* .....MPQEA**P**AR**I**ARELASH**G**YTADREAITLLARADD**T**ATALLVAVEAT**P**DDAL**K**L**T**AD**D**V  
*N. limnia* .....

*P. abyssi*

100 110 120 130 140 150 160

*P. abyssi* GGVS**QV**SSGEL**Q**EL**K**EE**S**PEISTT**E**EE**I**GG**L**EL**V**Q**S**SISTG...SEV**EY**NN**G**EN**G**ES**V**...VLD**KY**G**Y**P**I**L  
*T. barophilus* EKGTS**I**STGEP**M**EN**M**VS**E**TISTE**I**V**E**E**P**T**I**EG**G**ES**F**ISTGAP**S**PE**E**Y**T**G**A**D**E**EN**G**V**K**M**K**AV**Y**G**D**Y**G**V**L**V**P**  
*M. jannaschii* EKFL**D**I**F**L**Q**K**D**L**D**E**I**I**N**E**Y**K**D**F**D**F**I**F**Y**Y**T**G**E**E**K**E**K**P**K**EV**K**E**I**K**K**E**T**E**K**I**E**K**E**I**E**F**V**K**E**E**K**E**Q**F**I**K**S**  
*N. pharaonis* RAAL**D**E**G**G**P**TAR**R**D**P**I**S**E**G**DD**G**AS**P**DD**P**ET**T**SS**A**SGAV**S**.D**G**S**D**AG**E**Q**A**Q**E**AS**Q**P**E**P**V**PD**A**AD**D**DP**S**P**V**E  
*N. limnia* .....

β1 → TT → β2 →

*P. abyssi*

170 180 190 200 210 220

*P. abyssi* YAP.....E**I**G**I**...E**K**E**Y**S**K**Y**E**D**V**V**I**E**W**N**F**S**V**T**P**V...**Q**I**E**K**N**Y**E**V**K**F**D**V**R**Q**V**K**L**R**P**P**K**V**K**N**G**.S**G**K**E**.G**E**I  
*T. barophilus* L**E**E.....E**I**P**A**E**E**RRAY**S**I**Y**E**D**F**K**V**E**P**N**E**S**F**E**V**V**A**K**R**I**K**A**E**Y**E**I**K**F**D**V**R**N**V**K**L**K**P**K**A**K**N**A**.N**G**K**E**.G**E**V  
*M. jannaschii* D**E**D**V**E**E**K**L**Q**L**I**S**K**E**K**K**E**D**F.D**A**E**R**A**K**R**Y**E**H**I**T**K**I**K**E**S**V**N**S**R**I**K**W**I**A**K**D**I**D**A**V**I**E**I**Y**E.D**S**D**V**S**G**K**S**T**C**T**G**  
*N. pharaonis* T**E**D**G**S**G**V**G**Q**S**G**R**N**E**H**P**S**S**S**A**A**E**P**A**T**A**E**S**G**G**E**P**P**V**E**T**E**G**S**E**A**S**T**R**E**R**N**T**D**Q**S**L**R**D**L**D**I**G**N**D**M**T**G**R**S**T**G**T**G  
*N. limnia* I**H**P**N**A**F**K**F**L**E**N**V**D**V**K**K**L**E**K**I**L**I**K**E**I**V**R**E**K**T**K**Q**K**L**F**Q**I.N**Q**D**D**L**E**V**V**L**G**I**K**E**D**Q**T**L**Q**N**D**H**K**I**T**F**D**P**T**L**K**I**T**T**S**E

TT    TT    β3 → η1

*P. abyssi*

230 240 250 260 270 280 290

*P. abyssi* I**V**E**A**Y**A**S**L**F**K**S**R**L**S**K**L**K**R**I**L**R**E**N**P**E**I**S**N**V**D**I**G**K**L**N**Y**V**S**G**D**E**V**T**I**I**G**L**V**N**S**K**R**E**T**N**R**G.L**I**F**E**V**E**D**K**T**G**I**V**  
*T. barophilus* V**V**K**V**Y**E**N**Y**F**K**S**R**L**K**K**L**R**R**I**L**R**E**N**P**E**V**S**G**V**I**D**I**G**K**L**S**Y**I**N**P**E**G**E**V**T**I**I**G**L**V**N**S**K**R**E**T**K**K**G**F**I**F**E**V**E**D**M**T**G**I**V  
*M. jannaschii* T**I**E**D**F**V**K**Y**F**R**D**R**F**E**R**L**K**V**F**I**E**R**K**A**Q**R**K**Y**.P**L**K**D**I**K**M**K**G**Q**K**D**I**F**V**V**G**I**V**S**D**V**D**S**T**R**N**G**N**L**I**V**R**I**E**D**T**E**D**E**A  
*N. pharaonis* E**Y**D**D**F**V**A**T**F**R**D**R**Y**E**R**L**S**K**T**L**K**G**R**V**N**H**R**N**A.S**A**L**E**A**S**P**G**G**E**A**E**M...V**G**M**V**S**D**I**R**S**T**A**S**G**H**W**L**I**E**L**E**D**T**T**G**V**F**  
*N. limnia* G**V**K**G**Y**N**A**L**F**A**S**R**E**S**K**L**K**R**I**S**D**R**P**E**S**R**M**L**K**T**I**T**S**V**K**S**A**K**S**D**D**V**Y**V**C**G**L**V**T**S**.R**I**T**E**R**N**I**T**K**L**V**L**E**D**P**S**G**L**F

α1    TT    η2    TT    β4 → TT → β5

*P. abyssi*

300 310 320 330 340 350 360

*P. abyssi* K**V**F**L**P**K**D**S**E**D**Y**R**E**A**.F**K**V**L**P**D**A**V**V**A**F**K**G**F**Y**S**K**K**G**.I**F**F**A**N**K**F**Y**L**P**D**V**P**L**Y**R**K**Q**K**P**P**L**E**E**K**V**Y**A**I**L**I**S**D**I**H**V**G**  
*T. barophilus* K**V**F**L**G**R**D**N**E**D**Y**K**K**A**.F**E**V**L**P**D**S**V**V**A**F**R**G**Y**Y**S**K**R**G**.I**L**F**A**S**K**L**Y**L**P**D**V**P**L**Y**K**R**E**K**P**P**L**E**E**K**V**Y**A**V**L**I**S**D**I**H**V**G**  
*M. jannaschii* T**L**I**L**P**K**E**K**I**E**A**G**K**I**P**D**D**I**L**L**D**E**V**I**G**A**I**G**T**V**S**K**S**G**S**I**Y**V**D**E**I**I**R**P**A**L**P...P**K**E**P**K**R**I**D**E**I**Y**M**A**F**L**I**S**D**I**H**V**G**  
*N. pharaonis* P**C**M**I**L**K**D**R**D**I**A**G**L**V**.D**E**L**L**Y**D**E**V**V**A**V**E**G**T**L**S**D**D**G**S**I**M**F**V**D**D**L**Y**F**P**D**V**P**R**.T**H**E**P**S**T**A**D**R**H**V**E**A**A**L**I**S**D**V**H**V**G**  
*N. limnia* E**G**I**V**F...D**T**E**L**Q**K**V**A**S**L**L**N**D**O**F**I**M**A**R**I**G**V**G**K**N**S**G**Y**I...I**K**D**L**I**S**P**D**I**P**...D**Q**A**T**N**R**S**E**T**T**Y**A**V**F**L**S**D**L**H**I**G

β6 → TT    α2    TT    β7 →    β8 →    β9 → Motif 1

*P. abyssi*

370 380 390 400 410 420 430

*P. abyssi* S**R**E**F**C**E**K**A**F**L**K**F**L**E**W**L**I**N**G**H**V**E**S**K**E**E**E**I**V**S**R**V**K**Y**L**I**T**A**G**D**V**D**G**I**G**T**Y**P**Q**Q**Y**S**D**L**V**T**P**D**I**F**D**Q**Y**E**A**L**A**N**L**L**A  
*T. barophilus* S**T**K**F**C**E**K**A**F**M**K**F**L**E**W**L**I**N**G**N**V**E**S**R**E**E**E**I**V**S**R**I**K**Y**M**I**T**A**G**D**V**D**G**I**G**T**Y**P**Q**Q**Y**N**E**L**A**I**P**D**I**F**D**Q**Y**E**A**L**A**N**L**L**A  
*M. jannaschii* S**K**E**F**L**H**K**E**F**E**K**F**I**R**F**I**N**G**D**V**D**N**E**L**E**E**K**V**S**R**L**K**Y**I**C**I**T**A**G**D**L**V**D**G**V**G**V**Y**P**Q**Q**E**E**D**L**Y**E**V**D**I**E**O**Y**R**E**I**A**M**Y**L**D  
*N. pharaonis* S**Q**E**F**M**A**D**A**W**E**R**T**A**A**L**H**T**D**E...A**A**N**I**E**Y**L**L**I**T**A**G**D**M**V**E**G**V**G**V**Y**P**D**Q**D**E**E**L**D**I**V**D**I**F**D**Q**Y**E**Q**F**S**E**R**L**K  
*N. limnia* S**K**Y**F**M**E**E**E**F**T**E**F**V**S**W**L**S**S**P...D**P**I**A**R**K**I**R**F**V**L**I**G**D**L**V**D**G**V**G**T**Y**P**N**O**D**K**E**L**V**C**Q**T**I**E**E**Q**L**K**K**V**E**E**L**I**D**

TT    α3    α4    β10 → Motif 2    η3    α5

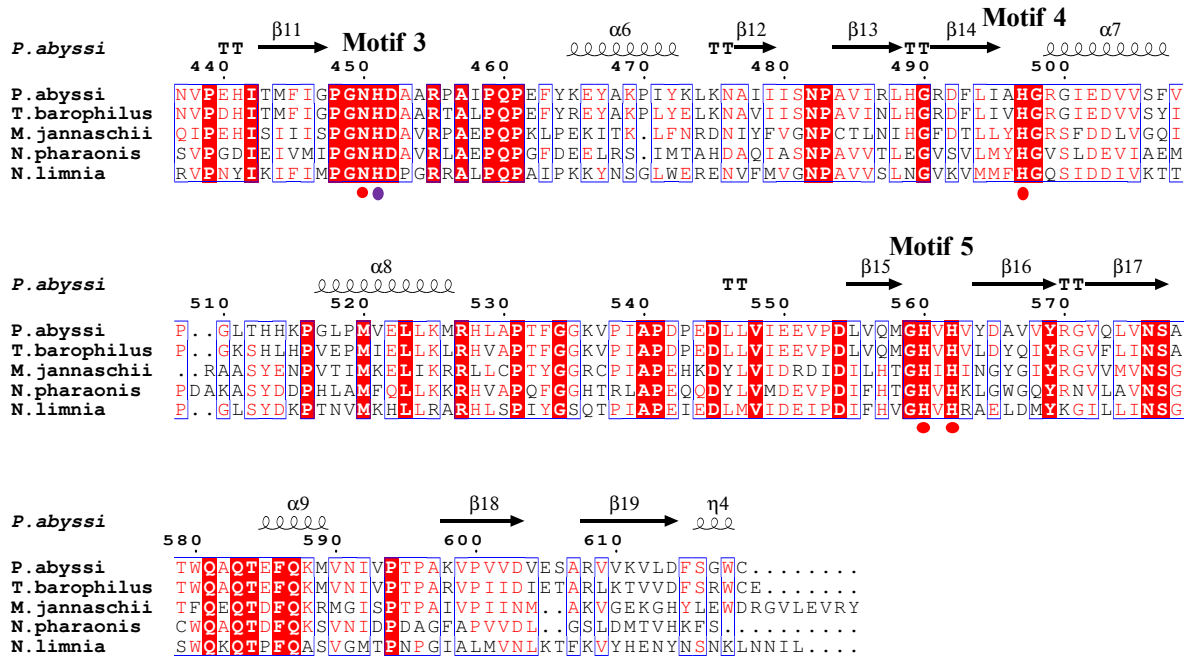

**Supplementary Figure 2: Alignment of DP1 structure amino acid sequence with other DP1 subunits.** MultAlin<sup>1</sup> and ESPript<sup>2</sup> 3.0 were used to generate an alignment with four representative protein sequences whose sequence diversity was chosen to best illustrate the sequence variability (GI accession number): *Pyrococcus abyssii* (499168969), *Thermococcus barophilus* (948739970), *Methanocadococcus jannaschii* (2833545), *Natronomonas pharaonis* (499641234), *Nitrosoarchaeum limnia* (329137458). Conserved residues are boxed in red and highly conserved residues are coloured in red. Secondary structure elements and phosphodiesterase conserved motifs observed in *P. abyssii* DP1 structure are also shown. Metal-coordinating residues and proton donor residues are outlined by red and purple circles, respectively.

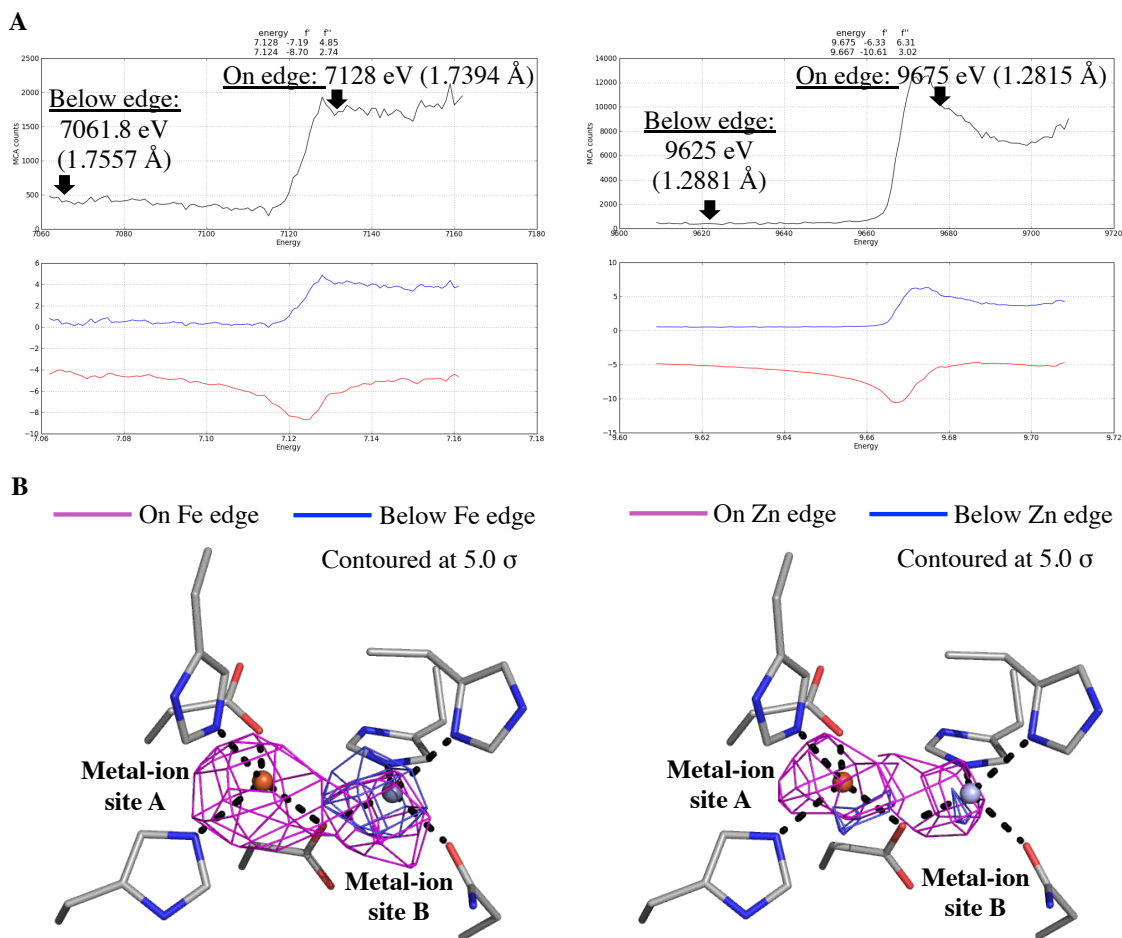

**Supplementary Figure 3: DP1 contains a dinuclear  $\text{Fe}^{3+}$ - $\text{Zn}^{2+}$  active site.** Validation of metal-ion binding sites by comparing anomalous maps calculated from datasets collected at different energies. (A) Plots showing the anomalous scattering coefficients as a function of energy around the iron (left) and zinc (right) K-edges. (B) Close-view of the dinuclear  $\text{Fe}^{3+}$ - $\text{Zn}^{2+}$  DP1 active site showing the anomalous maps calculated from datasets collected at the Fe K-edge and below the Fe K-edge (left panel), and the anomalous maps calculated from datasets collected at the Zn K-edge and below the Zn K-edge (right panel). Anomalous maps calculated at K-edge and below K-edge are contoured at 5  $\sigma$  and coloured in magenta and blue, respectively. All anomalous maps were calculated using a resolution range of 3.5-30 Å, from a set of datasets collected on the same crystal. Iron and zinc ions are shown as spheres coloured in red and grey, respectively.

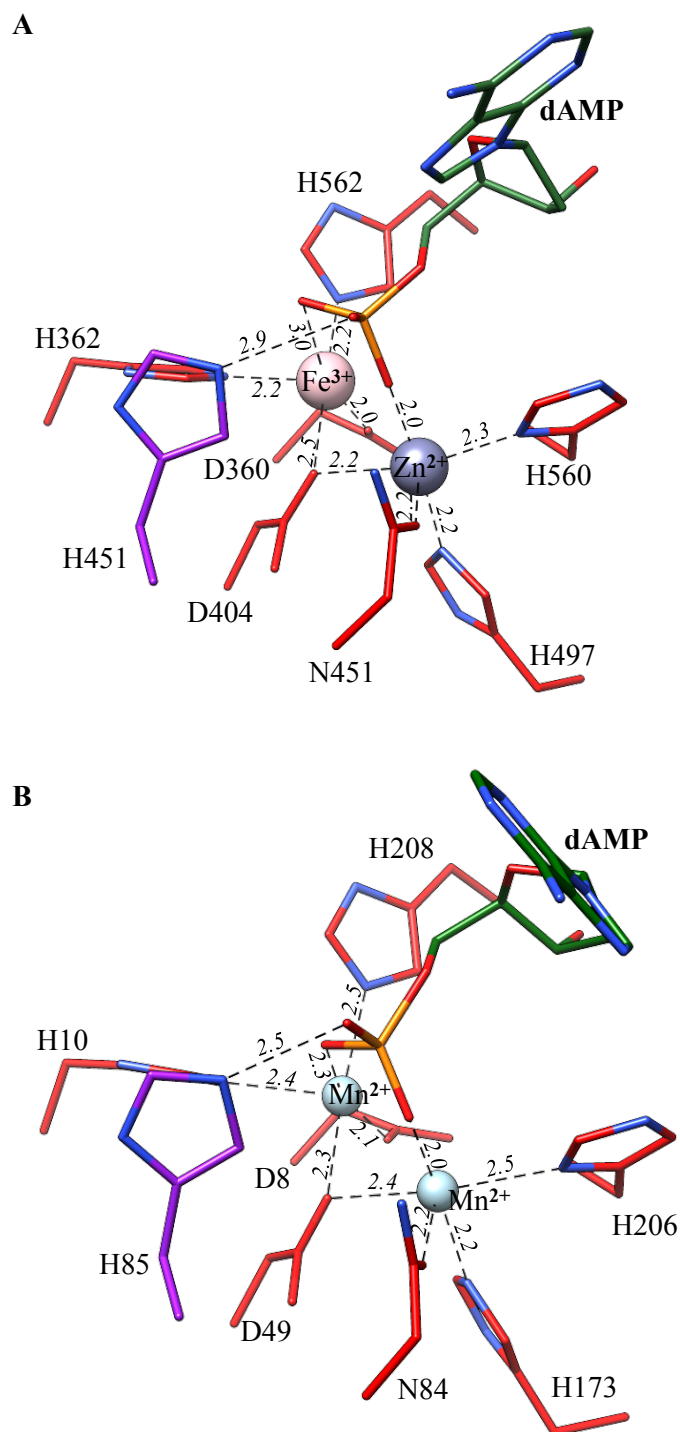

**Supplementary Figure 4. Distances between metal ions, dAMP and protein residues in DP1 and Mre11 PDE domains.** (A) Catalytic residues are shown as sticks, red for the metal-coordinating residues, purple for the proton-donor. dAMP is shown in green. Catalytic metals are shown as spheres. Distances are measured in Å. (B) Same view for *P. furiosus* Mre11.

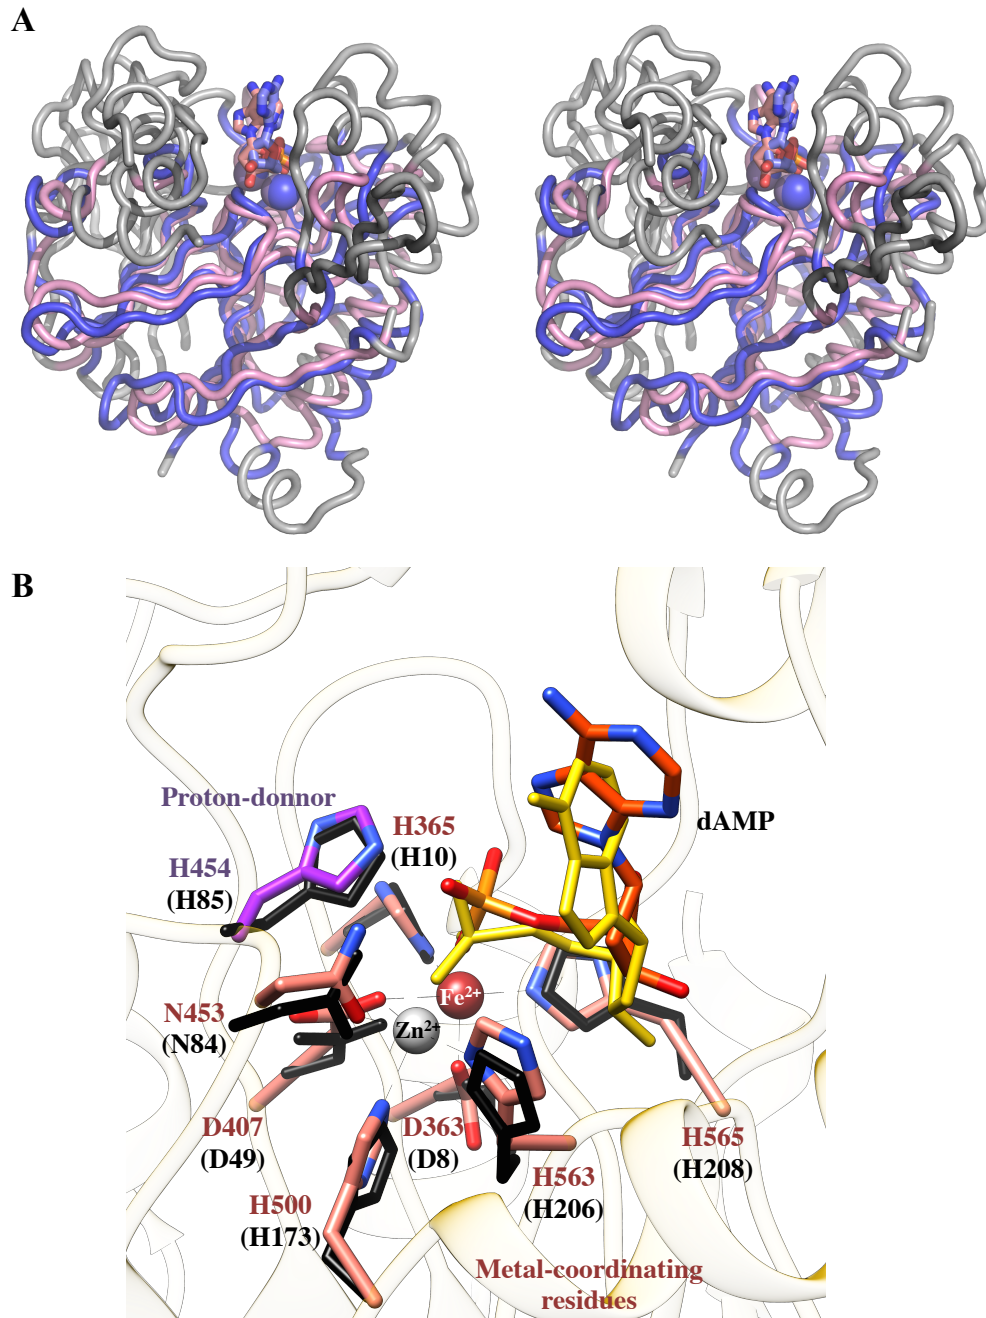

**Supplementary Figure 5. Comparison of the DP1 and Mre11 PDE domains.** (A) Cross-eye stereo-diagram of the N-terminal domain of the DP1 PDE domain superimposed on the PDE domain of *P. furiosus* Mre11. DP1 is drawn as a thin tube in blue, Mre11 in pink. Dissimilar regions are coloured in grey. Catalytic metals are shown as van der Waals spheres and dAMP as sticks. (B) Comparison of the DP1 and Mre11 nuclease active sites. Catalytic residues and dAMP are shown as sticks. For comparison, the corresponding residues and dAMP-bound molecule of the *P. furiosus* Mre11<sup>3</sup> active site superimposed on DP1 are shown in black and yellow, respectively.

| Z score | Entry  | rmsd | lali | nres | %id | Organism               | Description                               |
|---------|--------|------|------|------|-----|------------------------|-------------------------------------------|
| 33,1    | 3e0j-E | 3,0  | 353  | 408  | 19  | <i>H. sapiens</i>      | <b>DNAP <math>\delta</math> B-subunit</b> |
| 25,4    | 4y97-G | 3,5  | 354  | 436  | 15  | <i>H. sapiens</i>      | <b>DNAP <math>\alpha</math> B-subunit</b> |
| 24,0    | 3flo-A | 3,5  | 342  | 433  | 16  | <i>S. cerevisiae</i>   | <b>DNAP <math>\alpha</math> B-subunit</b> |
| 14,8    | 1s3m-A | 14,8 | 161  | 165  | 20  | <i>M. janaschii</i>    | Phosphodiesterase MJ0936                  |
| 14,3    | 1wyd-A | 14,3 | 117  | 428  | 16  | <i>S. tokodaii</i>     | Aspartyl-tRNA synthetase                  |
| 13,4    | 1low-A | 13,4 | 120  | 580  | 19  | <i>T. thermophilus</i> | Aspartyl-tRNA synthetase                  |
| 13,4    | 4wj3-M | 10,4 | 117  | 589  | 19  | <i>P. aeruginosa</i>   | Glutamyl-tRNA emidotransferase            |
| 13,4    | 1eqr-A | 11,5 | 116  | 590  | 17  | <i>E. coli</i>         | Aspartyl-tRNA synthetase                  |
| 13,3    | 2xtiB  | 13,7 | 118  | 429  | 17  | <i>B. malayi</i>       | Asparaginyl-tRNA synthetase               |
| 13,1    | 3tho-B | 3,2  | 177  | 366  | 16  | <i>T. maritima</i>     | Mre11                                     |
| 13,0    | 3av0-A | 3,0  | 182  | 369  | 14  | <i>M. janaschii</i>    | Mre11                                     |
| 13,0    | 2a22-A | 2,8  | 170  | 193  | 18  | <i>C. parvum</i>       | Vacuolar Protein Sorting 29               |
| 13,0    | 4rmf-A | 11,6 | 119  | 579  | 13  | <i>M. smegmatis</i>    | Aspartyl-tRNA synthetase                  |
| 13,0    | 4tug-A | 3,1  | 186  | 317  | 13  | <i>M. janaschii</i>    | Mre11                                     |
| 13,0    | 1il2-B | 11,4 | 117  | 585  | 16  | <i>S. cerevisiae</i>   | Aspartyl-tRNA synthetase                  |
| 12,9    | 1ii7-A | 3,1  | 183  | 333  | 18  | <i>P. furiosus</i>     | Mre11                                     |
| 12,9    | 3dsd-B | 3,2  | 184  | 333  | 13  | <i>P. furiosus</i>     | Mre11                                     |
| 12,8    | 3tli-C | 3,1  | 192  | 377  | 14  | <i>H. sapiens</i>      | Mre11                                     |
| 12,8    | 4fbw-A | 3,0  | 190  | 379  | 17  | <i>S. pombe</i>        | Mre11                                     |
| 12,8    | 4hd0-A | 3,1  | 185  | 332  | 18  | <i>P. furiosus</i>     | Mre11                                     |

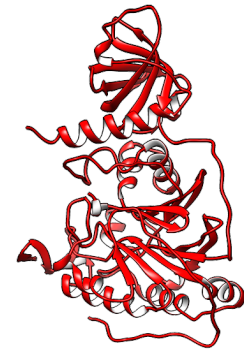

Dali search of the DP1 structure

| Z score | Entry  | rmsd | lali | nres | %id | Organism                     | Description                               |
|---------|--------|------|------|------|-----|------------------------------|-------------------------------------------|
| 14,6    | 1wyd-A | 1,6  | 85   | 428  | 20  | <i>S. tokodaii</i>           | Aspartyl-tRNA synthetase                  |
| 13,6    | 2xti-B | 1,4  | 82   | 429  | 23  | <i>B. malayi</i>             | Aspartyl-tRNA synthetase                  |
| 13,4    | 110w-A | 1,8  | 85   | 580  | 25  | <i>T. thermophilus</i>       | Aspartyl-tRNA synthetase                  |
| 13,3    | 4wj3-M | 1,7  | 85   | 589  | 24  | <i>P. aeruginosa</i>         | Glutamyl-tRNA synthetase                  |
| 13,2    | 1eqr-A | 1,8  | 85   | 590  | 21  | <i>E. coli</i>               | Aspartyl-tRNA synthetase                  |
| 13,0    | 4wj4-A | 1,7  | 85   | 586  | 24  | <i>P. aeruginosa</i>         | Aspartyl-tRNA synthetase                  |
| 12,9    | 1x54-A | 1,6  | 84   | 435  | 18  | <i>P. horikoshii</i>         | Aspartyl-tRNA synthetase                  |
| 12,9    | 4o2d-A | 1,7  | 83   | 581  | 18  | <i>M. smegmatis</i>          | Aspartyl-tRNA synthetase                  |
| 12,7    | 1il2-A | 1,9  | 85   | 585  | 21  | <i>S. cerevisiae</i>         | Aspartyl-tRNA synthetase                  |
| 12,6    | 3nem-A | 1,8  | 85   | 439  | 20  | <i>T. kodakarensis</i>       | Aspartyl-tRNA synthetase                  |
| 12,4    | 1efw-A | 1,9  | 85   | 580  | 25  | <i>E. coli</i>               | Aspartyl-tRNA synthetase                  |
| 12,2    | 1e24-A | 1,9  | 84   | 486  | 17  | <i>E. coli</i>               | Lysyl-tRNA synthetase                     |
| 12,1    | 3e9h-D | 1,8  | 84   | 485  | 17  | <i>G. stearothermophilus</i> | Lysyl-tRNA synthetase                     |
| 12,0    | 2z6k-B | 1,8  | 77   | 126  | 22  | <i>H. sapiens</i>            | Replication protein A                     |
| 11,9    | 1upa-A | 2,1  | 85   | 515  | 18  | <i>E. histolytica</i>        | Lysyl-tRNA synthetase                     |
| 11,9    | 3e0e-A | 1,7  | 78   | 91   | 14  | <i>M. maripaludis</i>        | Replication protein A                     |
| 11,7    | 1quq-A | 1,8  | 77   | 121  | 22  | <i>H. sapiens</i>            | Replication protein A                     |
| 11,7    | 3dm3-B | 1,8  | 78   | 98   | 24  | <i>M. janaschii</i>          | Replication protein A                     |
| 9,9     | 1z9f-A | 1,6  | 72   | 89   | 14  | <i>T. maritima</i>           | SSB protein                               |
| 9,9     | 2dud-B | 1,8  | 73   | 92   | 14  | <i>H. sapiens</i>            | Mitochondrial SSB protein                 |
| ...     | ...    | ...  | ...  | ...  | ... | ...                          | ...                                       |
| 7,8     | 3e0j-A | 2,2  | 70   | 416  | 17  | <i>H. sapiens</i>            | <b>DNAP <math>\delta</math> B-subunit</b> |
| ...     | ...    | ...  | ...  | ...  | ... | ...                          | ...                                       |
| 4,9     | 4y97-A | 2,0  | 70   | 442  | 21  | <i>H. sapiens</i>            | <b>DNAP <math>\alpha</math> B-subunit</b> |

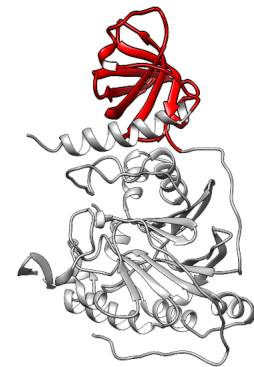

Dali search of the DP1 OB domain

| Z score | Entry  | rmsd | lali | nres | %id | Organism               | Description                               |
|---------|--------|------|------|------|-----|------------------------|-------------------------------------------|
| 25,8    | 3e0j-A | 2,5  | 264  | 416  | 19  | <i>H. sapiens</i>      | <b>DNAP <math>\delta</math> B-subunit</b> |
| 20,8    | 4y97-G | 3,2  | 266  | 436  | 14  | <i>H. sapiens</i>      | <b>DNAP <math>\alpha</math> B-subunit</b> |
| 19,4    | 3flo-A | 3,0  | 252  | 433  | 16  | <i>S. cerevisiae</i>   | <b>DNAP <math>\alpha</math> B-subunit</b> |
| 14,8    | 1s3m-B | 2,5  | 161  | 165  | 20  | <i>M. janaschii</i>    | Phosphodiesterase MJ0936                  |
| 13,1    | 3tho-B | 3,2  | 179  | 366  | 16  | <i>T. maritima</i>     | Mre11                                     |
| 13,0    | 2a22-A | 2,8  | 170  | 193  | 18  | <i>C. parvum</i>       | Vacuolar Protein Sorting 29               |
| 13,0    | 3av0-A | 3,0  | 182  | 369  | 14  | <i>M. janaschii</i>    | Mre11                                     |
| 12,9    | 4tug-A | 3,1  | 186  | 317  | 13  | <i>M. janaschii</i>    | Mre11                                     |
| 12,9    | 1ii7-A | 3,1  | 183  | 333  | 18  | <i>P. furiosus</i>     | Mre11                                     |
| 12,9    | 3dsd-B | 3,1  | 183  | 333  | 13  | <i>P. furiosus</i>     | Mre11                                     |
| 12,7    | 3tli-C | 3,1  | 191  | 377  | 14  | <i>H. sapiens</i>      | Mre11                                     |
| 12,7    | 4fbw-A | 3,0  | 190  | 379  | 17  | <i>S. pombe</i>        | Mre11                                     |
| 12,6    | 4fbq-A | 3,1  | 193  | 418  | 17  | <i>S. pombe</i>        | Nbs1-Mre11 complex                        |
| 12,8    | 4hd0-A | 3,1  | 185  | 332  | 18  | <i>P. furiosus</i>     | Mre11                                     |
| 12,6    | 1s8e-B | 3,2  | 184  | 333  | 17  | <i>P. furiosus</i>     | Mre11-3                                   |
| 12,5    | 3lh7-A | 3,1  | 183  | 333  | 18  | <i>M. musculus</i>     | Vacuolar Protein Sorting 29               |
| 12,3    | 1uf3-F | 3,0  | 167  | 228  | 12  | <i>T. thermophilus</i> | TT1561                                    |
| 12,2    | 2zo9-C | 3,1  | 177  | 271  | 15  | <i>E. aerogenes</i>    | glycerophosphodiesterase                  |
| 12,1    | 3ib7-A | 3,6  | 178  | 296  | 17  | <i>M. tuberculosis</i> | Rv0805                                    |
| 12,1    | 4yke-A | 3,0  | 191  | 404  | 16  | <i>C. thermophilum</i> | Mre11                                     |

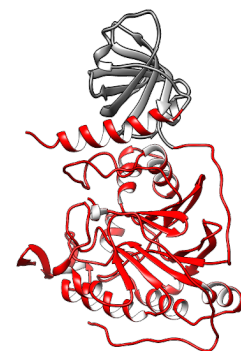

Dali search of the DP1 PDE domain

**Supplementary Figure 6. Dali<sup>4</sup> search of the DP1 structure against the Protein Data Bank.** Top twenty hits of DALI of the DP1 structure (top), DP1-OB domain (middle) and DP1-PDE domain (bottom) against the Protein Data Bank. Chain A was used in the search but comparable results were obtained with chain B. Eukaryotic DNA polymerases B-subunits are coloured in blue.

*P. abyssii*

α1

1 10 20 30 40

*P. abyssii* .....MELPKEMEEYFEMLQREIDKAYETAKKARAQCKDPSLQDVEIP  
*T. nautili* .....MGEELYSPEMKA YFESLQREIDRAYETARKARSQCKDPSLQDVEIP  
*P. pacificus* .....MSELYSENMKAYFEMLQREIDKAYEVAQKAREQCKDPMREIEVEIP  
*H. volcanii* .....MREETRYFRRIEARLDEAFDLAEAKATGYDPKTEVEIP  
*A. profundus* MQLKLTDFITGDQKKEESKPVREDCPILNIEIKYEHATLLKELERAYETAKKARSKLLDPPYNVEIP  
*M. barkeri* .....MGETIASKEMHEYFDELEARLKKAIETANTARARGDPPKPVVEIP  
*K. cryptofilum* .....MDYFDTLRKGMDLELSVARRARSLGLDPSNDIETLS

*P. abyssii*

β1 α2 α3 α4 α5

50 60 70 80 90 100

*P. abyssii* QATDMAGRVESLVGPPGVAERIRELVKELGKEIAALKVIVDEIIEGKFGDLGSRKEYAEQAVRTATA  
*T. nautili* QATDMAGRVESLVGPPGVAERIRELVKELGKELAAALKVVDEIIEGKFGDLGSRKEYAEQAVRTATA  
*P. pacificus* QATDMAGRVESLVGPPGVAERIRELVKELGKELASLKVIVDEIIEGKFGDLGSRKEYAEQAVRTATA  
*H. volcanii* VAKDMADRVENIIGIDGVAERIVRELAGEEMSRREAALELVDFVGNVGDYDSREKGVVEAVRTATA  
*A. profundus* IAKNMAERVEKLMGINGLAKRIVELLEEGLSREEICFKIAEEIVEGKFGKFDRETALDKAVRVAVA  
*M. barkeri* LAKDLADRVENLIGVEGVAAKIRVLEEKMSREECALIEIGRQVAGEVEGNFATKKDAVEAIRVMA  
*K. cryptofilum* LANELHERIALALEGIPELGERVKYWLDAATGSKLETAFRVIGEIVPGYYLKI.SYERRAELALRVGMA

*P. abyssii*

π1 β2 β3 η1 α6

110 120 130 140 150 160 170

*P. abyssii* ILTEGIVSAPTEGIANVKIKRNTWADNSEYIALLYAGPIRSSGGTAQAI SVLVGDYVRKLLGLDRFK  
*T. nautili* ILTEGIVSAPTEGIAADVKIKRNTWADNSEYIALLYAGPIRSSGGTAQAI SVLVGDYVRKLLGLDRFK  
*P. pacificus* VLTEGIVSAPTEGIAVVKIRENP...DGSYKALLYAGPIRSSGGTAQAI SVLVGDYVRKLLGLDGYK  
*H. volcanii* LLTEGIVSAPTEGIDRVEILEND...DGTEFVNYYAGPIRSSGGTAQAI SVLVADYARSLLDIDEYK  
*A. profundus* IQTEGVVAPTEGIAKIKIKND...DGTEFLKIYYAGPIRSSGGTAQAVV SVLVGDYVRKLLGLDRYK  
*M. barkeri* VITEGVVAPTEGINKVELGKN...DGSYIRIFYSGPPIRSSGGTAQAI SVLVGDYVRKIGIDRYK  
*K. cryptofilum* IITDATVSAPEGTSKVEVKKQ...GGTYLSVYVNGPIRTAGGTEGAI SVLMADYIRQRLGIDRYR

*P. abyssii*

α7 α8 β4 β5 TT β6

180 190 200 210 220 230 240

*P. abyssii* PSEKHIERMVEEVDLYHRAVTRLOYHPSPEVRLAMRNIPIEITGEATDDVEVS.HRDVPGVETNQL  
*T. nautili* PSEKHIERMVEEIDLHRAVTRLOYHPSPEVRLAMRNIPIEITGEATDDVEVS.HRNVPVETNHL  
*P. pacificus* PTHEEIERMVEEVDLYHRAVTRLOYHPSPEVRLAIAKNIPVEITGEATDDVEVSGYRNLPRVETNQL  
*H. volcanii* ARTDEVERMVEEINLYDK.VETGLOYSPKDKESRFIAENMPIMLDGEATDDEVS.SYRDLRVDNTSA  
*A. profundus* PREEEILRYCEEIPLYKK.VANLOYLPSDAEIRLIVENCPVCIDGEPTEDEVSGYRDLRVDNRSV  
*M. barkeri* PRPEEVMVEEIVLYKRVASLOYMPSDEIRLIVKNCVPCIDGEPTEEAEEVGHNRNLERIGTNRRI  
*K. cryptofilum* PTQEEIERMVEEVSLYKRIAHLOYNSEPEVRIAVSNLPEVITGPPTEKEEVS.SFRNLRVETNRSV

*P. abyssii*

α9 α10 α11

250 260 270 280 290 300

*P. abyssii* RGGAILVLAEGVLQKAKKLVKYIDKMGIEGWELKEFVEAKEKGEPEEGK.EESLAEEST.LEETK  
*T. nautili* RGGAILVLAEGVLQKAKKLVKYIDKMGVEGWDLKEFVEAKEKSKSEEPKVDDESKAEDSGAR.EEVA  
*P. pacificus* RGGAILVLAEGVLQKAKKLVKYIDKMGVEGWELKEFVESKESGKSEAVK.SEPLEA...KEEES  
*H. volcanii* RGGMCLVMAEGIALKAPKIQRYTRQLDEVDWPWLQDLIDGTIGKDDNAANADDAGDDGDEAEETD  
*A. profundus* RGGMCLVIAEGIALKAPKIKMVDKLDIDGWDLKDLINKEFEQEEVEVVKFTDATYQPKSEEE.EEVE  
*M. barkeri* RGGMCLVLAEGIALKAPKVKHVNKLNDGWDLIDILIGAKTGGE.....  
*K. cryptofilum* RGGAVLVINDCIIQKAKKLVKIIDQIKKIGFD...DSCWGWIEGKKEESEE.EAGGCP.....

*P. abyssii*

α12 β7 DPBB-1 β8 α13

310 320 330 340 350 360 370

*P. abyssii* VEVDMGFYYSLYQKFKEIAPSDKYAKKEVIGRPLFSDPSKPGGFRRLRYGRSRASGFATWGINPATM  
*T. nautili* EVKMGFFYYELYERFRANIPANKKYTKIIGRPLFAEPPSENGGFRRLRYGRSRVSGFATWSVNPATM  
*P. pacificus* VKVEMKGFYGLYETFREKIPANKKYTKIIGRPLFAEPPSNGGFRRLRYGRSRTSGFATWSIHPATM  
*H. volcanii* PDAEADDAESDAPDGPTRVEPATKFLRDLIAGRPVFGHPSAPGGFRRLRYGRARNHGFATAGVHPATM  
*A. profundus* SIEKEEKENQ.....EIKPKDKYLSDIVAGRPFVSHPSRKGFRRLRYGRARNHGFATVGINPATM  
*M. barkeri* .....EDEKKN.....KIKPKDKYIRDLIAGRPVFVSHPSRKGFRRLRYGRSRNTSFAAGINPATM  
*K. cryptofilum* .....VLEPSYKYIKDAVMGRPVLSHPSRIGFRRLRYGRARNITGLASIGMNPATM

*P. abyssii*

Secondary structure prediction β9 β10 β11 α14 η2 β12

380 390 400 410 420 430

*P. abyssii* ILVDEFIA:GTQLKTERPGKGA VVTPTTIEGPTVVKLKDGSVLRVDDYNTALKVRVEDVEEILYTGDA  
*T. nautili* LILDEFIA:GTQMKTERPGKGCIVTPTTIEGPTVVKLKDGSVVRVDDYETALRVKNEIEEILYVGD  
*P. pacificus* LVDEFIA:GTQMKTERPGKGCIVTPTTIEGPTVVKLKDGSVLRVDDYETALKVKDDVDEEILYGDV  
*H. volcanii* HIVDDFIA:GTQIKTERPGKAGVPTVDSIEGPTVRLANGDVRRIIDPEAKELQNGVEKILIDIGEY  
*A. profundus* VIADGFIA:GTQLKVERPGKAGVPTVTTIEGPTVVKLKNDDVVKINDYKTAALALKDEVEEIIIDIGEY  
*M. barkeri* VLLDFFIT:GTQLKVERPGKAAAMSAVDSIEGPTVRLYSGLDLVRIDDIKBAEYELMSQVEEIVDIGEY  
*K. cryptofilum* YLLDSFIA:GTQVRIERPGKSAVMPVDSIEGPTVRLRDSVLRVDDPEAMRIMDQVEEIIHIGDV

*P. abyssii*

β13 α15 α16 α17

440 450 460 470 480 490 500

*P. abyssii* VIAFGDFVENNQTLLPANYCEEWWILEFVKALKEIYEVHLEPFTENEESIEEASDYLEIDPEFLKE  
*T. nautili* LVNFGDFVENNQTLLPANYEEWWIQELVKAIEELYEVELKPFSDNPREAVEEEAAEYLDVDEPFLES  
*P. pacificus* LVNFGDFVENNQTLLPANYAEEWWIQELVKAIEIYEVKLEPFANDEDALEEEAAEYLDLEKPEFLAK  
*H. volcanii* LVNFGDFVENNQTLLPASYVFEWWIQEFATEANVQALRDDPAVDLEE.....GDFRK.....  
*A. profundus* LINYGFLENHPLMPASVCYEEWWIQEVRKGIN.....  
*M. barkeri* LINYGFLENHPLMPSPYVFEWWRYDYEAACEEII.....PEDELKD.....  
*K. cryptofilum* LIGYGFLENHPLPSAWVFEWWIALLVRRKGLRAV.....



*P. abyssii*      α18      η3      η4      α19      β14

510      520      530      540      550      560      570

*P. abyssii*      MLRDPLRVK **PPVELAI**HFSEV**LGIPLHP**YTY**LYWNS**VEPKD**VEK**LWRLLKN...Y**AEI**EW**SN**FRGIKF

*T. nautili*      MLRDPLRVK **PSVELAI**HLSK**VDIPFHP**YTY**LYWNT**LKPEE**VEEL**OK**ALLN**...**AOI**EW**DD**FRGIKF

*P. pacificus*      LLYDPLRVK **PKVEEA**IHLSR**VLGIPLHP**YTY**LYWNT**ISV**EE**LIR**LQEA**LVN...**AOI**EW**DD**FRGIKF

*H. volcanii*      ...**PSVEQA**LSWAT**EFDAPLHP**YTY**LYWHD**ISV**ERFD**AL**ADAV**AAGEI**VAAE**AD**GG**TTAA**L**

*A. profundus*      ...**ISEDEAL**R**LCDEY**G**VPLHP**YTY**LYWHD**ISV**EDYFY**L**RDFV**SGG...**KID**...**GKML**VL

*M. barkeri*      ...**PSSAL**AL**R**L**AE**E**YDV**PL**HP**K**ET**Y**LYWHD**IN**RT**E**F**AL**R**K**FV**GR**GN**F**SVE**...**DEI**L**R**L

*K. cryptofilum*      ...**RGFED**AL**R**AS**RELD**V**PLHP**R**ET**Y**LYW**EH**ITS**E**EL**L**K**LAG**AI**R**NSER**A**EI**D**LNE**D

*P. abyssii*      β15      α20      η5      α21      β16      β17      α22      η6

580      590      600      610      620

*P. abyssii*      AKKIVIS**Q**E**KL**G...D**SKRT****LEH**L**GLPH**TV...R**DGN**V**IV**D**YP**WAA**ALL**T**PL**G**NLN**WE**FM**

*T. nautili*      AKRVIL**EN**D**P**...Q**IKRY****LEH**L**GLPH**RL**ERT**E**DR**R**KV**I**VI**D**YP**W**SS****ALL**T**PL**G**DLE**WE**FK**

*P. pacificus*      AKRVLIG**E**F...S**VKGA****LEH**L**GLPH**Y**ID**...**DGF**I**VD**Y**P**W**S**A**ALL**V**P**L**L**N**L**E**K**K**L**

*H. volcanii*      EHDNE**F**E**H**G**LE**GL**T**L**V**D**N**A**PE**I**RE**A**LEH**L**V**A**H**R**QT**...**D**E**AL**R**V**P**V**W**R**L**A**R**S**L**GL**T**D**R**E**R**T**W**E**

*A. profundus*      D**Y**...**DD**R...**AKR**I**LE**D**L**V**E**H**K**V...**NN**K**I**V**I**E**K**W**K**V**L**R**CL**G**L**T**F**D**L**R...**K**V**D**

*M. barkeri*      PLKACI**EN**G...**V**K**L**I**LE**R**L**V**L**H**R**V...**AD**T**IL**I**KE**A**L**P**F**I**CL**G**L**D**CH**L**KE**K**A**P

*K. cryptofilum*      ...**IKR**I**LEH**L**GL**V**P**H**R**V...**NG**K**I**V**L**D**E**E**D**W**K****ALS**Y**IAS****K**L**P**E**S**L**E**

*P. abyssii*      TT      α23      β18

630      640      650      660      670      680

*P. abyssii*      A**K**P**L**...**Y**A**T**I**DI**I**N**E**IK**L**R**D**R**G**I**S**W**I**G**A**R**M**GR**P**E**K**A**K**E**R**K**M**K**P**P**V**Q**V**L**F**P**I**G**L**A**G**G**

*T. nautili*      A**K**P**F**...**F**T**V**I**DI**I**N**E**SN**P**IK**L**R**D**R**G**I**S**W**I**G**A**R**M**GR**P**E**K**A**K**E**R**K**M**K**P**P**V**Q**V**L**F**P**I**G**L**A**G**G**

*P. pacificus*      P**K**E**F**...**Y**T**P**I**DL**I**N**E**V**S**IK**L**R**D**K**G**I**S**W**I**G**A**R**M**GR**P**E**K**A**K**E**R**K**M**K**P**P**V**H**V**L**F**P**I**G**L**A**G**G**

*H. volcanii*      L**D**D**L**S**E**R**A**R**T**W**D**D**G**D**N**A**V**E**AV**N**E**V**A**P**F**N**R**V**R**A**P**T**R**I**C**N**R**M**GR**P**E**K**S**E**R**D**LS**P**AV**H**T**L**F**P**I**G**E**A**G**G

*A. profundus*      I**K**A**E**...**G**N**I**L**D**I**V**R**K**L**S**G**L**D**V**R**A**K**A**P**T**R**I**C**A**R**M****GR**P**E**K**A**K**E**R**R**M**S**P**PH**I**L**F**P**I**G**L**A**G**G**

*M. barkeri*      M**P**D**T**...**D**N**M**V**N**A**T**A**L**S**G**F**K**V**L**R**A**P**S**R**I**C**A**R**M****GR**P**E**K**A**N**I**L**R**M**S**P**AA**Q**V**L**F**P**I**G**L**A**G**G

*K. cryptofilum*      L**P**R...**Y**A**T**I**K**V**L**N**O**Y**L**D**V**K**V**M**P**K**G**P**T**I**C****MR**V**GR**P**E**K**A**K**P**R**K**M**K**P**P**V**N**L**L**F**P**I**G**N**L**K**G**

*P. abyssii*      η7      α24      β19      β20      β21      Zn-finger I      β22      Zn-finger II      β23

690      700      710      720      730

*P. abyssii*      S**S**R**D**I**K**K**A**...**E**E**G**K**V**A**E**...**V**E**I**A**F**F**K**C**P**K**C**G**H**V**G**P**E**H**L**C**P**N**C**G**T**R**K**E**L**L**W**V**C**PR**C**N**A**E**Y**P**E**S**Q**

*T. nautili*      Q**S**R**D**I**K**K**A**...**E**E**G**K**T**A**K**...**V**E**I**A**F**F**K**C**P**K**C**G**H**T**G**P**E**H**L**C**P**V**C**G**T**R**K**E**L**L**W**H**C**PKN**V**Y**P**E**S**E

*P. pacificus*      S**S**R**D**I**Y**K**A**...**E**E**G**K**S**T**T**...**V**E**I**A**H**F**K**C**P**E**C**G**H**V**D**I**F**P**T**C**P**R**C**N**S**K**E**H**L**Y**T**C**P**KCHSST**E**E**K**

*H. volcanii*      S**Q**R**D**V**G**D**A**A**R**H**R**G**E**S**G**K**R**G**Q**I**S**V**R**L**G**O**R**K**C**P**E**D**C**G**A**F**G**F**K**S**K**C**D**C**G**G**H**T**E**P**H**Y**E**C**D**DCGSVI**E**P**D**E

*A. profundus*      K**Q**R**N**I**K**E**A**I**N**...**C**T**S**N**G**V**R**E**GE**I**E**V**E**I**A**L**R**R**C**K**E**C**G**K**E**G**F**W**L**K**C**K**C**G**V**T**H**Q**I**Y**P**C**R**I**K**C**G**S**E**

*M. barkeri*      L**T**R**N**I**V**S**A**S**N**Y**S**V**S**M**NG**K**I**G**E**I**E**V**E**M**G**I**R**E**C**P**A**C**G**K**E**T**Y**F**W**R**C**D**C**G**E**Y**T**R**P**K**L**F**C**PRCKIEV**R**N**S**E

*K. cryptofilum*      S**S**R**S**L**D**L**A**Y...**E**K**G**S**V**N**E**V**A**L**R**L**R**C**K**C**G**S**R**T**T**L**F**R**C**P**N**C**G**S**P**T**Y**K**I**S**F**C**P**ICGKVNGKC

*P. abyssii*      α25      β24      α26      α27

750      760      770      780      790      800

*P. abyssii*      A**E**G**Y**N**T**C**P**K**C**N**V**K**L**R**P**Y**A**K**R**K**I**R**P**S**E**L**L**N**R**A**M**E**N**V**K**V**Y**G...**V**D**K**L**K**G**V**M**G**M**T**S**G**W**K**M**P**E**P**I**E**K**G**L**L**

*T. nautili*      A**K**E**F**G**F**R**C**P**R**C**D**V**E**L**K**P**Y**A**E**R**E**I**K**P**S**E**L**L**R**A**M**D**N**V**K**V**Y**G...**I**D**R**L**K**G**V**K**G**M**T**S**G**Y**K**M**A**E**P**I**E**K**G**L**L**

*P. pacificus*      V...**C**P**N**C**R**I**D**M**R**P**Y**A**R**Y**S**F**K**V**S**D**Y**L**V**P**A**M**R**N**V**R**V**N**T**...**L**D**K**L**K**G**V**L**G**M**S**S**A**F**K**L**A**E**P**I**E**K**G**L**L**

*H. volcanii*      S**G**R**V**...**Y**C**E**R**C**E**W**D**V**E**S**A**E**W**Q**D**V**D**L**N**S**E**Y**D**R**A**L**E**R**V**G**E**R**S**S**F**Q**I**L**K**G**V**K**G**L**T**S**A**N**K**T**P**E**I**E**K**G**V**L**

*A. profundus*      V...**C**P**N**C**K**E**A**K**P**Y**L**K**R**K**I**N**I**E**F**Y**E**E**AL**K**N**L**N**E**W**D**S**...**F**D**V**I**K**G**V**I**G**M**T**S**K**M**I**P**E**R**I**E**K**G**L**L

*M. barkeri*      T...**C**P**K**C**G**R**K**P**T**S**V**S**N**V**K**L**D**F**R**S**I**Y**K**R**A**F**E**N**V**G**E**R**E**K**M**D**L**I**K**G**V**K**R**L**M**N**G**Q**M**T**P**E**P**I**E**K**G**L**L**

*K. cryptofilum*      Q...**D**H**P**N**A**E**P**V**Y**R**S**V**K**L**N**I**R**E**V**D**V**R**A**L**R**K**L**G**E**S**P**G**I**L**E**R**V**K**G**V**K**G**L**T**S**G**S**K**I**P**E**PI**E**K**G**L**L**

*P. abyssii*      β25      β26      α28      α29      β27      β28

810      820      830      840      850      860      870

*P. abyssii*      R**A**K**N**D**V**Y**V**F**K**D**G**T**I**R**E**D**A**T**D**A**P**I**T**H**F**R**P**E**I**G**V**S**V**E**K**L**R**E**L**G**Y**T**H**D**F**E**G**K**P**I**V**S**E**D**O**I**V**E**L**F**V**O**D**I**I**

*T. nautili*      R**V**K**N**D**V**Y**V**F**K**D**G**T**I**R**E**D**A**T**D**A**P**I**T**H**F**K**P**K**E**I**G**V**S**V**E**K**L**R**E**L**G**Y**T**H**D**F**E**G**K**P**I**E**R**D**D**O**I**V**E**L**F**V**O**D**I**I

*P. pacificus*      R**A**K**N**D**V**Y**V**F**K**D**G**T**I**R**E**D**A**T**D**A**P**I**T**H**F**R**P**E**I**G**V**S**V**E**K**L**R**E**L**G**Y**T**H**D**F**E**G**K**P**I**V**S**E**D**O**I**V**E**L**F**V**O**D**I**I**

*H. volcanii*      R**A**K**H**D**V**Y**S**F**K**D**G**T**I**R**V**D**M**T**D**L**P**V**T**A**V**R**P**E**L**D**V**T**A**D**H**F**R**E**L**G**Y**E**T**D**I**D**G**E**F**I**R**F**D**O**L**E**L**F**V**O**D**I**V**

*A. profundus*      R**A**K**H**G**V**F**V**F**K**D**G**T**I**R**V**D**M**T**D**L**P**L**T**H**F**K**P**K**E**I**G**V**S**V**E**R**L**R**E**L**G**Y**R**H**D**Y**M**G**N**E**L**K**N**D**D**O**I**V**E**L**F**V**O**D**I**V

*M. barkeri*      R**A**K**H**D**V**Y**I**F**K**D**G**T**I**R**V**D**M**S**D**I**P**L**T**H**V**R**A**D**E**I**G**I**T**A**A**K**L**R**E**L**G**Y**V**E**D**I**Y**G**N**E**L**V**E**D**O**I**V**E**L**F**V**O**D**I**V**

*K. cryptofilum*      R**A**K**H**G**L**S**V**F**K**D**G**T**I**R**E**D**A**V**N**A**V**L**T**H**F**K**P**K**E**I**G**V**S**V**E**K**L**R**E**L**G**Y**L**E**D**V**E**G**K**Y**L**E**R**D**O**L**L**E**L**F**V**O**D**I**I**

*P. abyssii*      α30      η8      β29      β30

880      890      900      910      920      930      940

*P. abyssii*      L**S**K**E**A**G**R**Y**L**L**K**V**A**K**F**V**D**D**L**L**E**K**F**Y**G**L**P**R**F**Y**N**A**E**K**M**E**D**L**I**G**H**L**V**I**G**L**A**P**H**T**S**A**G**I**V**G**R**I**I**G**F**V**D**A**L**V**G

*T. nautili*      L**S**Y**E**A**G**K**Y**L**L**K**V**A**R**F**V**D**D**L**L**E**K**F**Y**G**L**P**R**F**Y**N**A**E**K**M**E**D**L**I**G**H**L**V**I**G**L**A**P**H**T**S**A**G**I**I**G**R**I**I**G**F**S**D**V**L**V**G

*P. pacificus*      L**P**K**T**A**G**E**Y**L**V**R**V**A**N**F**I**D**D**L**L**E**K**F**Y**G**L**R**F**Y**N**A**E**K**M**E**D**L**V**G**H**L**V**I**G**L**A**P**H**T**S**A**G**I**I**G**R**I**V**G**F**V**D**A**L**V**G**

*H. volcanii*      L**S**N**G**A**A**Q**H**M**M**Q**T**A**D**F**V**D**D**L**L**D**Q**F**Y**G**L**D**R**E**F**Y**E**I**E**R**D**D**L**I**G**E**L**V**F**G**M**A**P**H**T**S**A**A**V**V**G**R**V**V**G**F**T**T**A**A**V**G

*A. profundus*      I**S**K**S**C**A**E**Y**L**V**R**V**A**K**F**I**D**D**L**L**V**K**F**Y**G**L**E**P**Y**Y**K**V**E**K**P**E**D**L**I**G**H**L**V**I**G**L**A**P**H**T**S**A**G**V**L**G**R**I**I**G**F**V**D**M**N**A**C

*M. barkeri*      I**S**Y**D**G**G**Y**M**L**R**T**A**Q**Y**V**D**D**L**L**V**K**Y**G**V**E**P**Y**N**A**K**T**I**Q**D**L**V**G**V**L**L**I**G**L**A**P**H**T**S**A**G**V**L**G**R**L**I**G**T**R**A**S**V**G

*K. cryptofilum*      I**P**R**A**A**K**Y**L**L**S**I**A**N**Y**I**D**D**L**L**V**K**F**Y**G**L**E**P**F**Y**N**L**R**D**E**S**D**L**I**G**L**V**L**T**I**S**P**H**T**F**V**A**N**L**A**R**I**I**G**F**T**N**A**D**V**I

*P. abyssii*      β31      β32      α31      η9      β33

950      960      970      980      990      1000

*P. abyssii*      Y**A**H**P**Y**H**A**A**K**R**R**N**C**D**G**D**E**D**A**V**M**L**L**D**A**L**L**N**F**S**R**Y**Y**L**P**E**K**R**G**G**K**M**D**A**F**L**V**I**T**F**R**L**D**P**R**E**V**D**S**E**V**H**N**M**D

*T. nautili*      Y**A**H**P**Y**H**A**A**K**R**R**N**C**D**G**D**E**D**A**V**M**L**L**D**A**L**L**N**F**S**K**Y**Y**L**P**E**K**R**G**G**K**M**D**A**F**L**V**V**T**F**R**L**D**P**R**E**V**D**S**E**V**H**N**M**D

*P. pacificus*      Y**A**H**P**Y**H**A**A**K**R**R**N**C**D**G**D**E**D**A**V**M**L**L**D**A**L**L**N**F**S**K**Y**Y**L**P**D**K**R**G**G**Q**M**D**A**F**L**V**M**S**R**I**D**P**S**E**I**D**E**A**H**N**M**D

*H. volcanii*      Y**A**H**P**Y**H**A**A**K**R**R**N**C**D**G**D**E**S**V**M**L**L**D**L**L**N**F**S**R**Y**F**L**P**D**K**R**G**G**Q**M**D**A**F**L**V**L**T**A**I**D**P**R**E**V**D**K**E**V**H**N**M**D**

*A. profundus*      Y**A**H**P**F**H**A**A**K**R**R**N**C**D**G**D**E**S**C**V**M**L**L**M**D**G**L**L**N**F**S**R**A**Y**L**P**E**K**R**G**G**K**M**D**A**F**L**V**L**T**F**R**I**D**P**K**E**V**D**E**A**H**N**I**D

*M. barkeri*      Y**A**H**P**F**H**A**A**K**R**R**N**C**D**G**D**E**S**C**V**M**L**L**M**D**G**L**L**N**F**S**R**E**F**L**P**S**S**F**G**G**R**E**D**A**F**L**L**L**V**T**K**V**D**P**K**Y**I**D**D**E**V**Y**N**M**E**

*K. cryptofilum*      F**A**H**P**F**H**A**A**K**R**R**N**C**D**G**D**E**S**I**M**L**L**D**A**L**D**A**L**L**N**F**S**R**E**F**L**P**S**S**F**G**G**R**E**D**A**F**L**L**V**T**K**V**D**P**K**Y**I**D**D**E**V**Y**N**M**E**



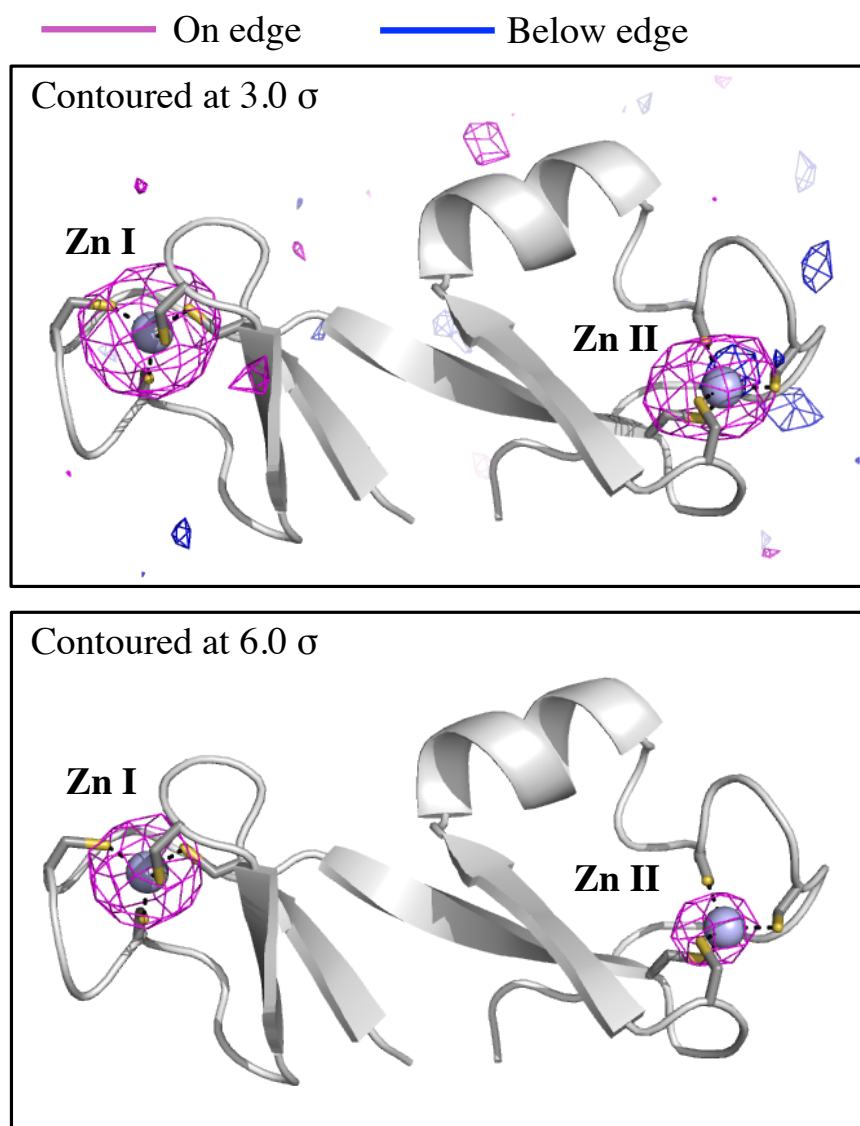

**Supplementary Figure 8: DP2 contains two zinc metal-ion binding motifs.** Validation of metal-binding sites by comparing anomalous maps calculated from datasets collected at different energies. Close-view of zinc metal-ion binding motifs I and II. The anomalous maps calculated from datasets collected at the Zn K-edge (9671 eV – 1.2820 Å) and below the Zn K-edge (9625 eV – 1.2882 Å) are shown as mesh in magenta and blue, respectively. Anomalous maps are calculated using a resolution range of 3.5-30 Å and contoured at  $3 \sigma$  (top panel) or  $6 \sigma$  (bottom panel). DP2 is shown in ribbon, the cysteine ligands as sticks and zinc ions as spheres.

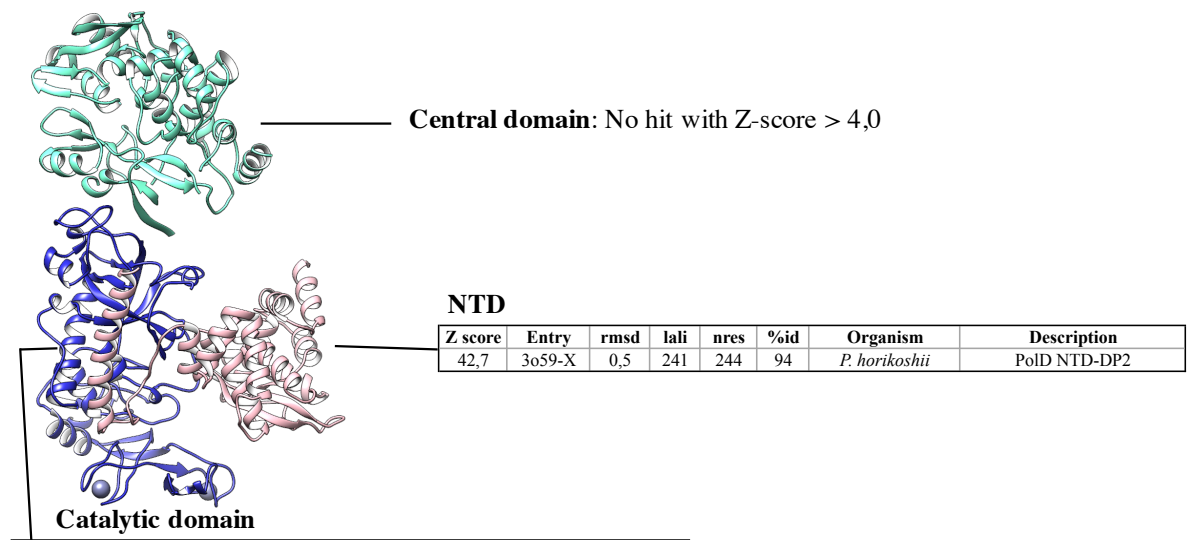

| Z score | Entry  | rmsd | lali | nres | %id | Organism             | Description  |
|---------|--------|------|------|------|-----|----------------------|--------------|
| 42,7    | 3o59-X | 0,5  | 241  | 244  | 94  | <i>P. horikoshii</i> | PolD NTD-DP2 |

| Z score | Entry  | rmsd | lali | nres | %id | Organism               | Description                 |
|---------|--------|------|------|------|-----|------------------------|-----------------------------|
| 6,0     | 4mex-J | 5,1  | 126  | 1143 | 15  | <i>E. coli</i>         | RNAP $\beta'$ subunit       |
| 5,9     | 5flm-A | 5,1  | 135  | 1427 | 11  | <i>B. taurus</i>       | RNAP II <i>RPB1</i> subunit |
| 5,9     | 4xss-D | 5,3  | 138  | 1166 | 14  | <i>E. coli</i>         | RNAP $\beta'$ subunit       |
| 5,8     | 4bbs-A | 5,9  | 140  | 1419 | 10  | <i>S. cerevisiae</i>   | RNAP II <i>RPB1</i> subunit |
| 5,8     | 4yfp-D | 6,3  | 146  | 1362 | 13  | <i>E. coli</i>         | RNAP $\beta'$ subunit       |
| 5,7     | 3hox-A | 4,7  | 134  | 1417 | 7   | <i>S. cerevisiae</i>   | RNAP II <i>RPB1</i> subunit |
| 5,7     | 4yln-J | 5,2  | 134  | 1362 | 14  | <i>E. coli</i>         | RNAP $\beta'$ subunit       |
| 5,7     | 4vln-A | 5,5  | 139  | 1422 | 9   | <i>S. cerevisiae</i>   | RNAP II <i>RPB1</i> subunit |
| 5,7     | 4yfp-J | 6,3  | 148  | 1362 | 14  | <i>E. coli</i>         | RNAP $\beta'$ subunit       |
| 5,6     | 4c3h-A | 5,4  | 136  | 1523 | 10  | <i>S. cerevisiae</i>   | RNAP I <i>A190</i> subunit  |
| 5,6     | 1k83-A | 4,6  | 124  | 1366 | 8   | <i>S. cerevisiae</i>   | RNAP II <i>RPB1</i> subunit |
| 5,6     | 4yfk-D | 4,9  | 135  | 1163 | 14  | <i>E. coli</i>         | RNAP $\beta'$ subunit       |
| 5,6     | 3m4o-A | 4,9  | 134  | 1395 | 7   | <i>S. cerevisiae</i>   | RNAP II <i>RPB1</i> subunit |
| 5,6     | 4ylo-D | 5,2  | 134  | 1362 | 14  | <i>E. coli</i>         | RNAP $\beta'$ subunit       |
| 5,6     | 2nqv-A | 5,3  | 136  | 1405 | 10  | <i>S. cerevisiae</i>   | RNAP II <i>RPB1</i> subunit |
| 5,6     | 3hkf-I | 5,5  | 133  | 836  | 8   | <i>S. solfataricus</i> | RNAP <i>RPOL</i> subunit    |
| 5,6     | 4a3g-A | 5,9  | 141  | 1422 | 9   | <i>S. cerevisiae</i>   | RNAP II <i>RPB1</i> subunit |
| 5,5     | 4c2m-A | 6,5  | 146  | 1521 | 10  | <i>S. cerevisiae</i>   | RNAP I <i>A190</i> subunit  |
| 5,5     | 3sln-A | 4,9  | 133  | 1405 | 7   | <i>S. cerevisiae</i>   | RNAP II <i>RPB1</i> subunit |
| 5,5     | 4yfn-D | 5,1  | 130  | 1163 | 15  | <i>E. coli</i>         | RNAP $\beta'$ subunit       |
| 5,5     | 2yu9-A | 5,3  | 136  | 1411 | 10  | <i>S. cerevisiae</i>   | RNAP II <i>RPB1</i> subunit |
| 5,5     | 2a69-D | 5,3  | 142  | 1392 | 13  | <i>T. thermophilus</i> | RNAP $\beta'$ subunit       |
| 5,4     | 4c3i-A | 5,8  | 142  | 1484 | 10  | <i>S. cerevisiae</i>   | RNAP I <i>A190</i> subunit  |
| 5,4     | 4qiw-A | 4,2  | 116  | 863  | 8   | <i>T. kodakarensis</i> | RNAP <i>RPOL</i> subunit    |
| 5,4     | 1twf-A | 4,7  | 135  | 1419 | 10  | <i>S. cerevisiae</i>   | RNAP II <i>RPB1</i> subunit |
| 5,4     | 2pmz-Q | 5,3  | 133  | 776  | 9   | <i>S. solfataricus</i> | RNAP <i>RPOL</i> subunit    |
| 5,4     | 4fer-B | 3,2  | 94   | 207  | 6   | <i>B. subtilis</i>     | Expansin                    |
| 5,4     | 1r9s-A | 4,9  | 135  | 1381 | 7   | <i>S. cerevisiae</i>   | RNAP II <i>RPB1</i> subunit |
| 5,4     | 4b1p-W | 5,5  | 131  | 872  | 10  | <i>S. shibatae</i>     | RNAP <i>RPOL</i> subunit    |
| 5,4     | 4s20-I | 5,3  | 134  | 1160 | 13  | <i>E. coli</i>         | RNAP $\beta'$ subunit       |
| 5,4     | 2b63-A | 5,5  | 137  | 1416 | 10  | <i>S. cerevisiae</i>   | RNAP II <i>RPB1</i> subunit |
| 5,4     | 2pmz-A | 5,3  | 132  | 776  | 8   | <i>S. solfataricus</i> | RNAP <i>RPOL</i> subunit    |
| 5,4     | 2cw0-D | 5,3  | 140  | 1392 | 13  | <i>T. thermophilus</i> | RNAP $\beta'$ subunit       |
| 5,4     | 4by7-A | 6,0  | 140  | 1426 | 10  | <i>S. cerevisiae</i>   | RNAP II <i>RPB1</i> subunit |
| 5,4     | 4gzz-D | 5,8  | 142  | 1358 | 13  | <i>T. thermophilus</i> | RNAP $\beta'$ subunit       |
| 5,4     | 4x67-A | 5,6  | 138  | 1394 | 9   | <i>S. cerevisiae</i>   | RNAP II <i>RPB1</i> subunit |
| 5,4     | 2o5i-N | 5,0  | 139  | 1303 | 14  | <i>T. thermophilus</i> | RNAP $\beta'$ subunit       |
| 5,4     | 3qc8-A | 3,2  | 87   | 170  | 10  | <i>H. sapiens</i>      | Trans. End. Ret. ATPase     |
| 5,4     | 4q4z-D | 6,1  | 145  | 1494 | 13  | <i>T. thermophilus</i> | RNAP $\beta'$ subunit       |
| 5,3     | 1r9t-A | 4,9  | 134  | 1395 | 7   | <i>S. cerevisiae</i>   | RNAP II <i>RPB1</i> subunit |
| 5,3     | 3d30-A | 3,1  | 94   | 208  | 6   | <i>B. subtilis</i>     | Expansin-like               |
| 5,3     | 4xss-D | 4,9  | 136  | 1166 | 14  | <i>E. coli</i>         | RNAP $\beta'$ subunit       |
| 5,3     | 3j0k-A | 4,8  | 135  | 1426 | 7   | <i>H. sapiens</i>      | RNAP II <i>RPB1</i> subunit |
| ...     | ...    | ...  | ...  | ...  | ... | ...                    | ...                         |
| 5,3     | 1ynj-D | 5,1  | 132  | 1238 | 14  | <i>T. aquaticus</i>    | RNAP $\beta'$ subunit       |
| ...     | ...    | ...  | ...  | ...  | ... | ...                    | ...                         |
| 5,0     | 1n10-A | 3,8  | 103  | 228  | 10  | <i>P. pratense</i>     | Pollen allergen PHL P1      |
| ...     | ...    | ...  | ...  | ...  | ... | ...                    | ...                         |
| 4,0     | 2j7o-A | 3,7  | 108  | 934  | 10  | <i>N. crassa</i>       | RNAP <i>QDE1</i> -like      |
| ...     | ...    | ...  | ...  | ...  | ... | ...                    | ...                         |

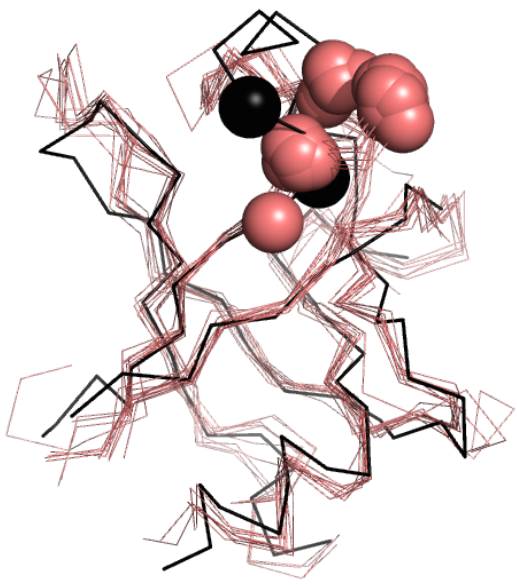

**Supplementary Figure 9. Dali<sup>4</sup> search of the NTD-, catalytic- and central- domains of DP2 structure against the Protein Data Bank.** The PolD double-psi beta-barrel (DPBB-2) (black) is superimposed onto the double-psi beta-barrels (DPBB-A) of 11 representative RNA polymerases structures identified from the Dali search (red): RNAP  $\beta'$  subunit from *E. coli* (4MEX<sup>6</sup>), RNAP II *RPB1* subunit from *B. taurus* (5FLM<sup>7</sup>), RNAP II *RPB1* subunit from *S. cerevisiae* (4BBS<sup>8</sup>), RNAP I *A190* subunit from *S. cerevisiae* (4C3H<sup>9</sup>), RNAP *RPOL* subunit

from *S. solfataricus* (3HKZ<sup>10</sup>), RNAP  $\beta'$  subunit from *T. thermophilus* (2A69<sup>11</sup>), RNAP *RPOL* subunit from *T. kodakarensis* (4QIW<sup>12</sup>), RNAP *RPOL* subunit from *S. shibatae* (4BLP<sup>13</sup>), RNAP II *RPB1* subunit from *H. sapiens* (3J0K<sup>7</sup>), RNAP  $\beta'$  subunit from *T. aquaticus* (1YNJ<sup>14</sup>) and RNAP QDE1-like from *N. crassa* (2J7O<sup>15</sup>).  $C\alpha$  of the catalytic aspartic residues are shown as spheres (red for RNAPs, black for PolD).

**A**

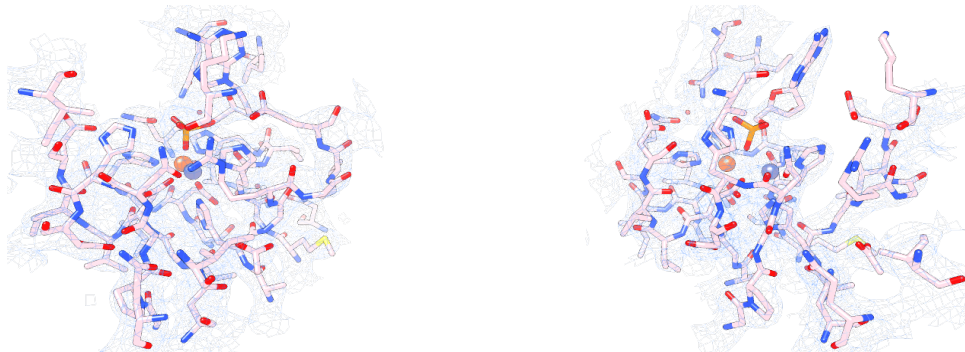

**B**

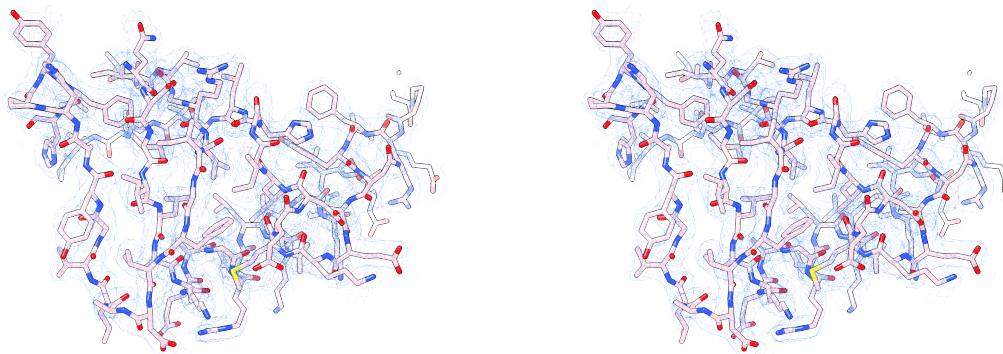

**Supplementary Figure 10.** Illustration of the quality of the electron density. Stereo images of a portion of the 2Fo-Fc electron density map contoured at 1.0  $\sigma$  for both DP1 (A) and DP2 (B) crystal structures.

## References

1. Corpet, F., Gouzy, J. & Kahn, D. Browsing protein families via the ‘Rich Family Description’ format. *Bioinforma. Oxf. Engl.* **15**, 1020–1027 (1999).
2. Robert, X. & Gouet, P. Deciphering key features in protein structures with the new ENDscript server. *Nucleic Acids Res.* **42**, W320–W324 (2014).
3. Hopfner, K. P. *et al.* Structural biochemistry and interaction architecture of the DNA double-strand break repair Mre11 nuclease and Rad50-ATPase. *Cell* **105**, 473–485 (2001).
4. Holm, L. & Rosenström, P. Dali server: conservation mapping in 3D. *Nucleic Acids Res.* **38**, W545–W549 (2010).
5. Kelley, L. A., Mezulis, S., Yates, C. M., Wass, M. N. & Sternberg, M. J. E. The Phyre2 web portal for protein modeling, prediction and analysis. *Nat. Protoc.* **10**, 845–858 (2015).
6. Degen, D. *et al.* Transcription inhibition by the depsipeptide antibiotic salinamide A. *eLife* **3**, e02451 (2014).
7. Bernecky, C., Herzog, F., Baumeister, W., Plitzko, J. M. & Cramer, P. Structure of transcribing mammalian RNA polymerase II. *Nature* **529**, 551–554 (2016).
8. Sainsbury, S., Niesser, J. & Cramer, P. Structure and function of the initially transcribing RNA polymerase II-TFIIB complex. *Nature* **493**, 437–440 (2013).
9. Fernández-Tornero, C. *et al.* Crystal structure of the 14-subunit RNA polymerase I. *Nature* **502**, 644–649 (2013).
10. Hirata, A., Klein, B. J. & Murakami, K. S. The X-ray crystal structure of RNA polymerase from Archaea. *Nature* **451**, 851–854 (2008).
11. Artsimovitch, I. *et al.* Allosteric modulation of the RNA polymerase catalytic reaction is an essential component of transcription control by rifamycins. *Cell* **122**, 351–363 (2005).
12. Jun, S.-H. *et al.* The X-ray crystal structure of the euryarchaeal RNA polymerase in an open-clamp configuration. *Nat. Commun.* **5**, 5132 (2014).
13. Wojtas, M. N., Mogni, M., Millet, O., Bell, S. D. & Abrescia, N. G. A. Structural and functional analyses of the interaction of archaeal RNA polymerase with DNA. *Nucleic Acids Res.* **40**, 9941–9952 (2012).
14. Campbell, E. A. *et al.* Structural, functional, and genetic analysis of sorangicin inhibition of bacterial RNA polymerase. *EMBO J.* **24**, 674–682 (2005).
15. Salgado, P. S. *et al.* The structure of an RNAi polymerase links RNA silencing and transcription. *PLoS Biol.* **4**, e434 (2006).
